# Supplementary material for: An implantable and versatile piezoresistive sensor for the monitoring of human–machine interface interactions and the dynamical process of nerve repair
Source: Royal Society of Chemistry journal article supplement (doi:10.1039/c9nr03925b), 2019-01-01
Supplement: c9nr03925b6.pdf [file c9nr03925b6.pdf]

## Supporting Information

### **An implantable and versatile piezoresistive sensor for the monitoring of human-machine interfacing interactions and dynamical process of nerve repair**

Ping Wu<sup>a</sup>, Ao Xiao<sup>a</sup>, Yanan Zhao<sup>a</sup>, Feixiang Chen<sup>a</sup>, Meifang Ke<sup>a</sup>, Qiang Zhang<sup>a</sup>,  
Jianwei Zhang<sup>b</sup>, Xiaowen Shi<sup>b</sup>, Xiaohua He<sup>a</sup> and Yun Chen<sup>a, c\*</sup>

<sup>a</sup> Department of Biomedical Engineering, School of Basic Medical Sciences, Wuhan University, Wuhan 430071, China

<sup>b</sup> School of Resource and Environmental Science, Hubei International Scientific and Technological Cooperation Base of Sustainable Resource and Energy, Wuhan University, Wuhan 430079, China

<sup>c</sup> Hubei Province Key Laboratory of Allergy and Immune Related Diseases, Wuhan University, Wuhan 430071, China

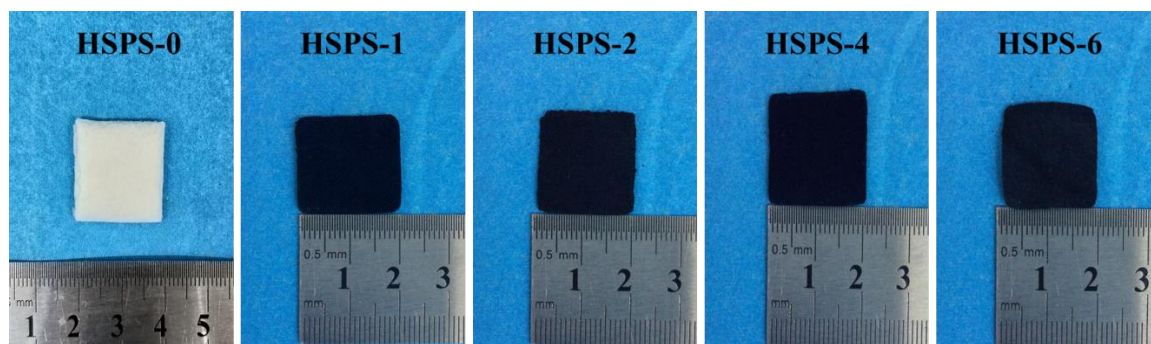

Figure S1. Photograph of HSPS-*t*

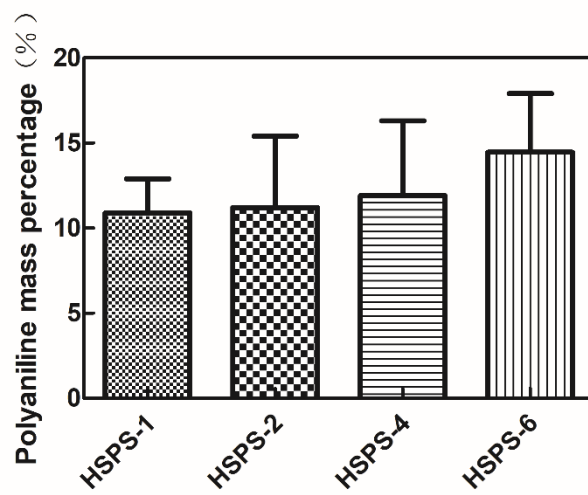

Figure S2. Polyaniline mass percentage in HSPS-1, HSPS-2, HSPS-4 and HSPS-6

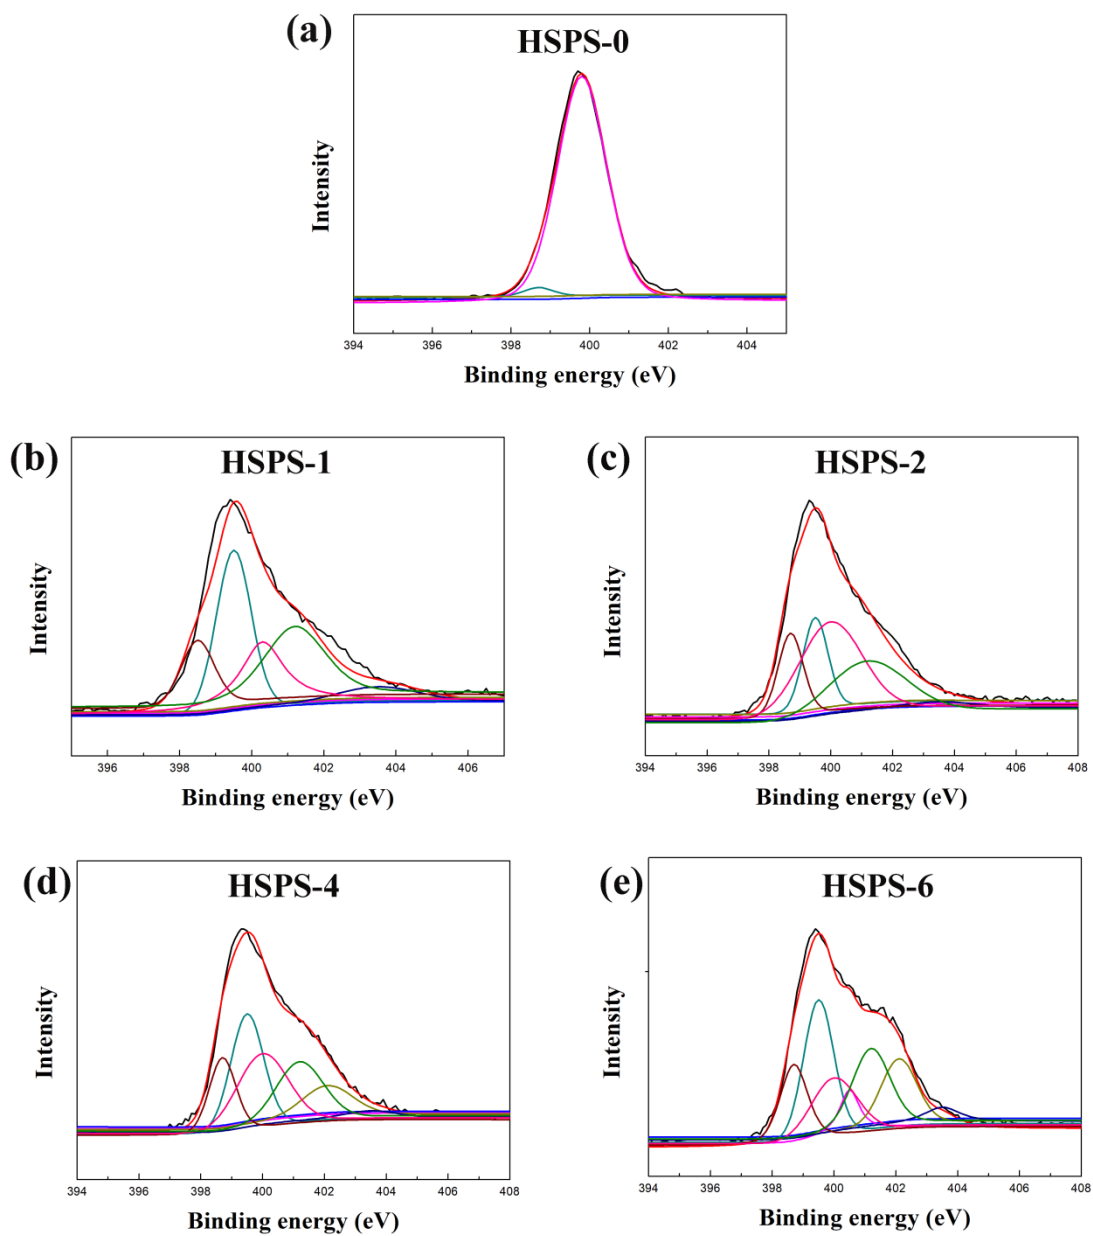

Figure S3.  $N_{1s}$  core level spectra of HSPS- $t$

Table S1. XPS results of HSPS-*t*

|               |                     | - N=   | - N -  | - N <sup>+</sup> | =N <sup>+</sup> | NH/N-C | C=N/N-C | H-N-COO/<br>N-C=C (SPI) |
|---------------|---------------------|--------|--------|------------------|-----------------|--------|---------|-------------------------|
|               |                     | (PANI) | (PANI) | (PANI)           | (PANI)          | (SPI)  | (SPI)   | (SPI)                   |
| <b>HSPS-0</b> | Binding energy (eV) | 399.5  | 400.5  | 402.5            | 403.5           | 398.7  | 399.8   | 401.2                   |
|               | Binding area (%)    | -      | -      | -                | -               | 3.3    | 96.7    | ≈0                      |
| <b>HSPS-1</b> | Binding energy (eV) | 399.5  | 400.5  | 402.5            | 403.5           | 398.5  | 400     | 401.2                   |
|               | Binding area (%)    | 33.3   | ≈0     | ≈0               | 6.7             | 7.7    | 23.6    | 28.7                    |
| <b>HSPS-2</b> | Binding energy(eV)  | 399.5  | 400.5  | 402.5            | 403.5           | 398.7  | 400     | 401.2                   |
|               | Binding area (%)    | 15.7   | ≈0     | 0.7              | 2.9             | 15.6   | 38.7    | 26.4                    |
| <b>HSPS-4</b> | Binding energy(eV)  | 399.5  | 400.5  | 402.5            | 403.5           | 398.5  | 400     | 401.2                   |
|               | Binding area (%)    | 26.7   | ≈0     | 10.6             | 2.2             | 15.6   | 25.9    | 19                      |
| <b>HSPS-6</b> | Binding energy(eV)  | 399.5  | 400.5  | 402.5            | 403.5           | 398.5  | 400     | 401.2                   |
|               | Binding area (%)    | 25     | 7.6    | 13.8             | 4.2             | 15.6   | 15.7    | 18.1                    |

Table S2. The  $(-N^+ + =N^+)/N$  percentage in PANI of HSPS-1, HSPS-2, HSPS-3 and HSPS-4

|                                  | HSPS-1 | HSPS-2 | HSPS-4 | HSPS-6 |
|----------------------------------|--------|--------|--------|--------|
| $(-N^+ + =N^+)/N$ percentage (%) | 16.7   | 18.5   | 32.4   | 35.6   |

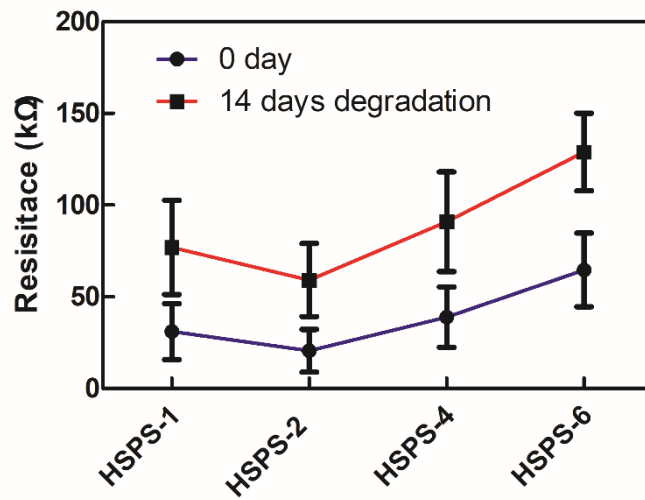

Figure S4. The resistance of HSPS-1, HSPS-2, HSPS-4 and HSPS-6 after 0 and 14 days of *in vitro* degradation

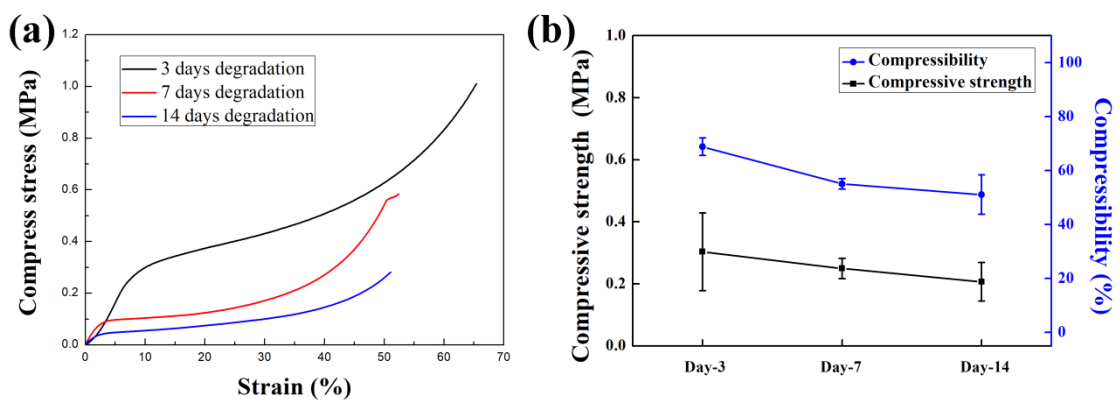

Figure S5. The compressive stress-strain (a), compressibility and compressive strength curves (b) of the HSPS-2 sponge after 3, 7 and 14 days *in vitro* degradation

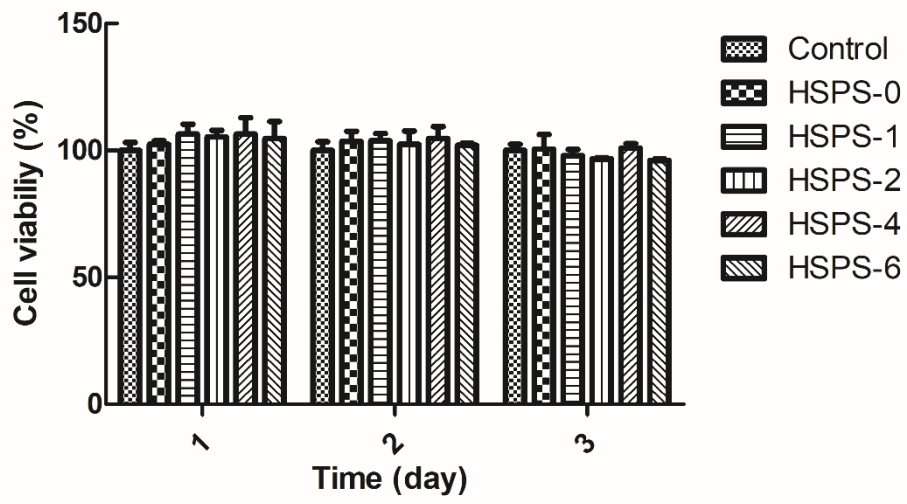

Figure S6. Cell viability of L929 cells incubated with HSPS-*t* extract

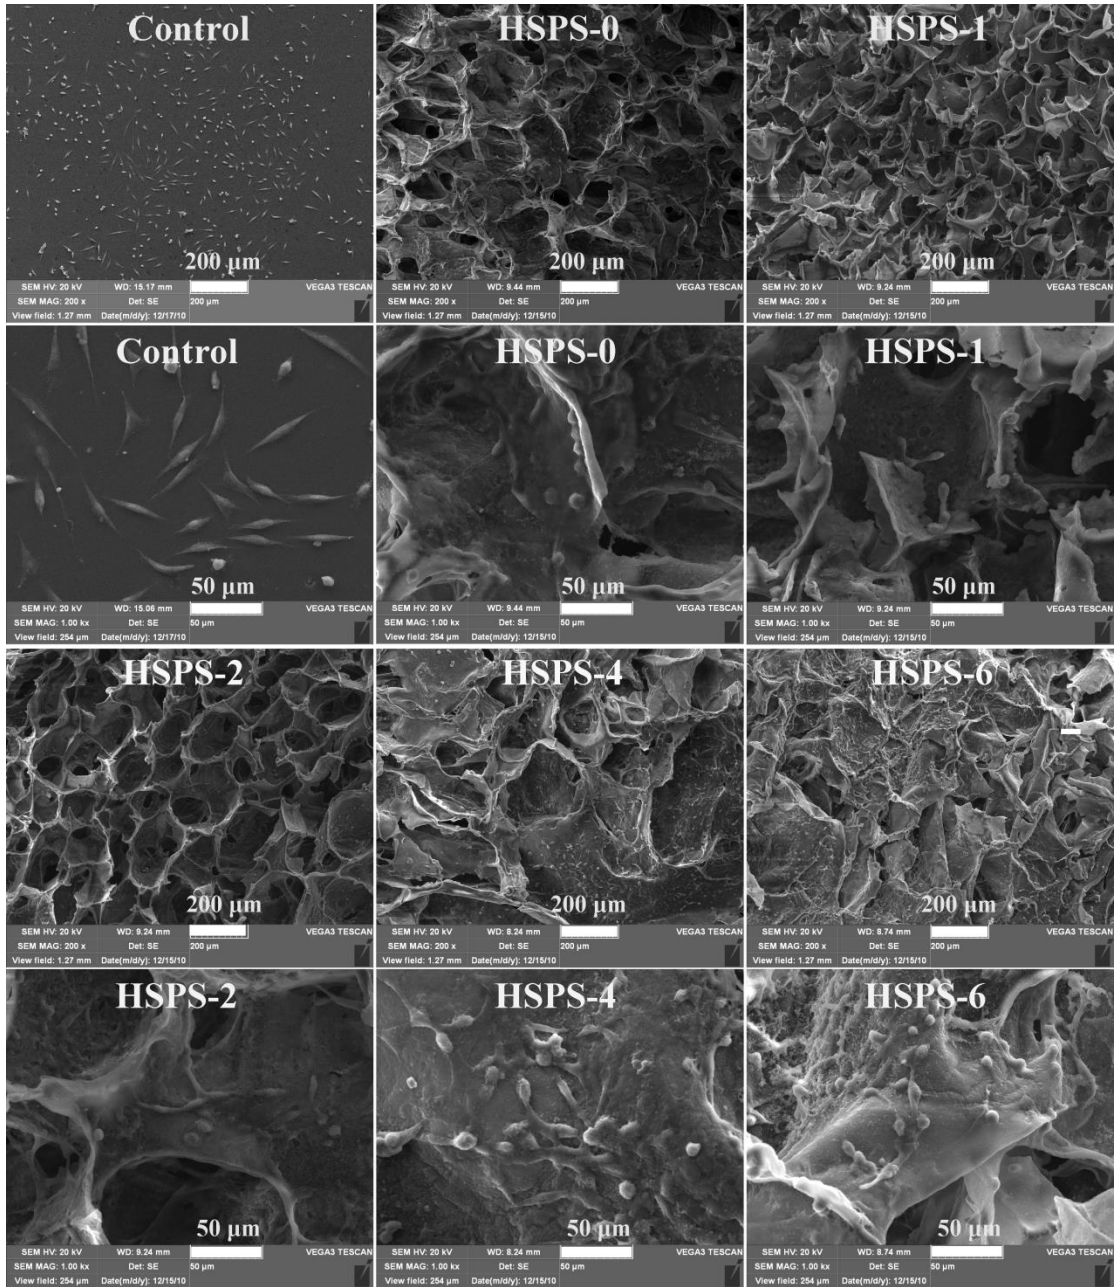

Figure S7. SEM images of L929 cells cultured on tissue culture plate (control) and the surface of HSPS-*t*.



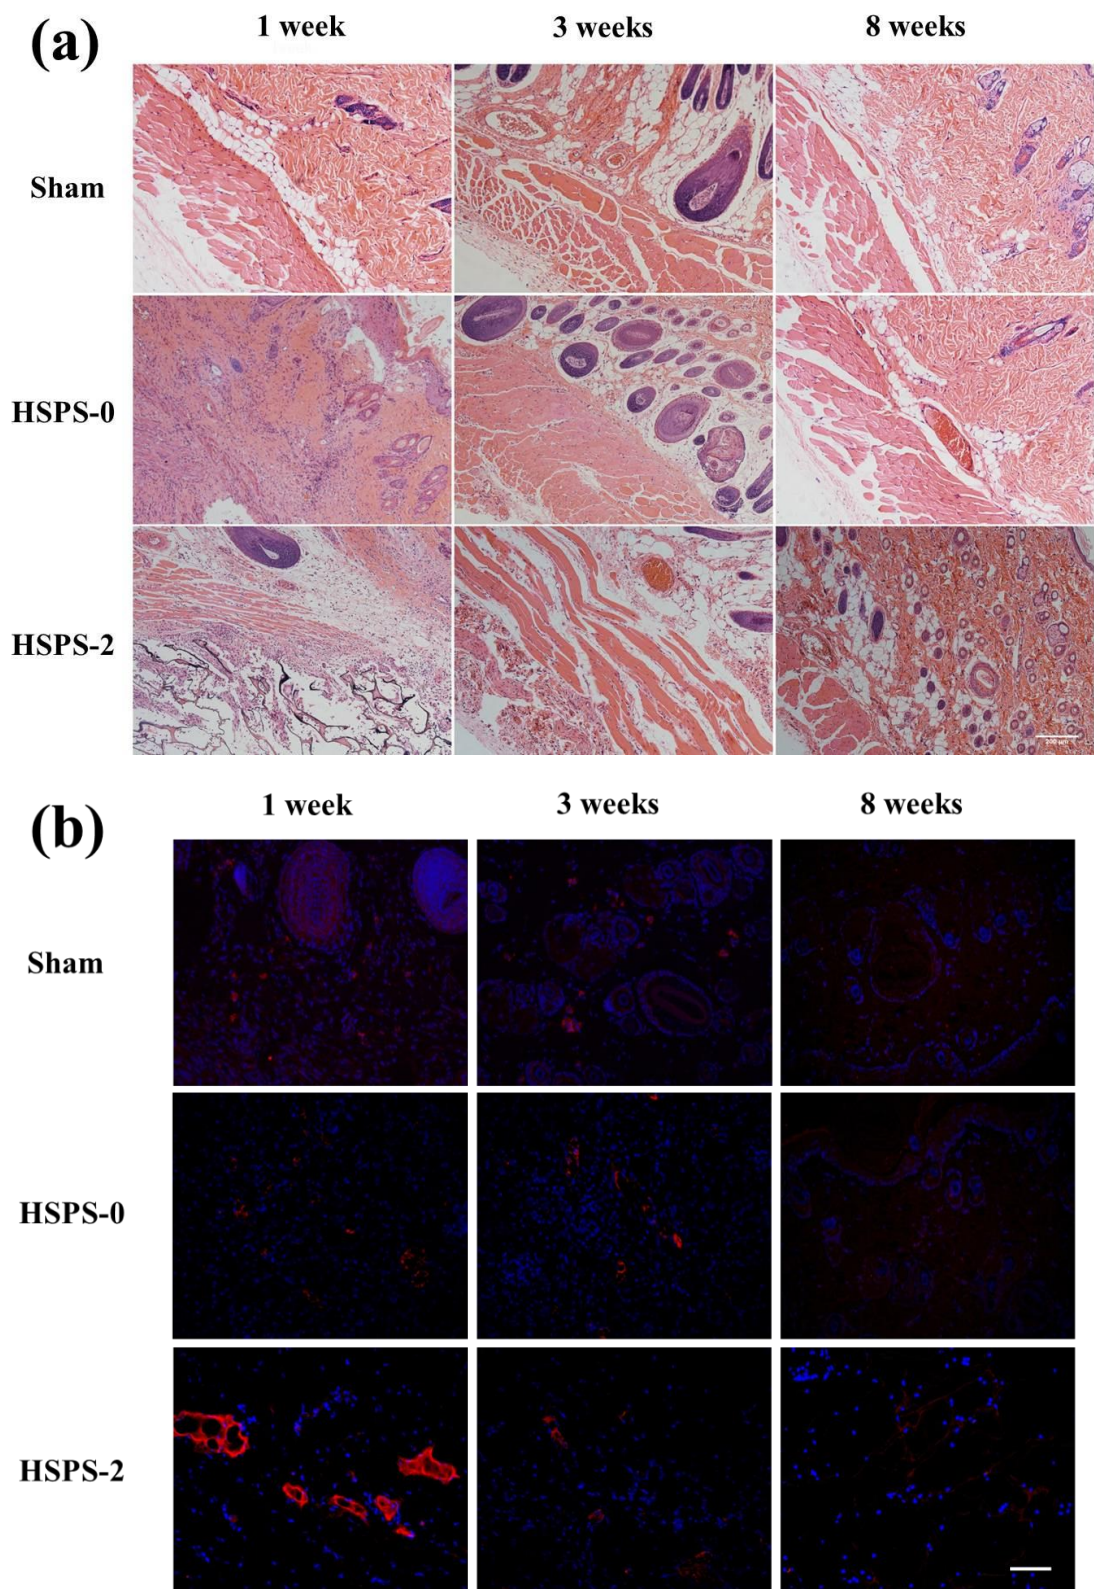

Figure S8. Biocompatibility of sham-operation, HSPS-0 and HSPS-2 sponges evaluated *in vivo*. (a) HE-staining after sensor implantation, scar bar=200  $\mu\text{m}$ , (b) Immunofluorescent-staining after sensor implantation, scale bar=50  $\mu\text{m}$ .



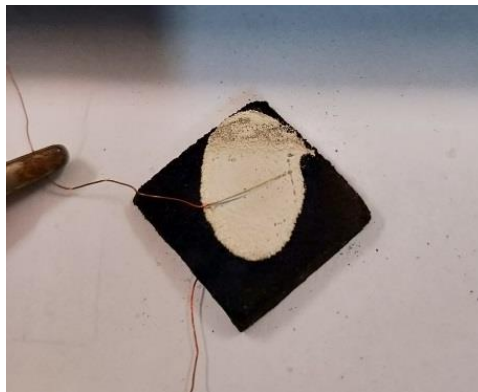

Figure S9. HSPS-2 sponge coated with conductive silver paste
